# Supplementary material for: Novel fluorescein polymer-based nanoparticles: facile and controllable one-pot synthesis, assembly, and immobilization of biomolecules for application in a highly sensitive biosensor
Source: PubMed Central journal article supplement — RSC Adv. 2020 Jan 16;10(5):2998–3004. doi: 10.1039/c9ra09106h (PMC9048966; doi:10.1039/c9ra09106h), 2020-01-16
Supplement: RA-010-C9RA09106H-s001.pdf [file RA-010-C9RA09106H-s001.pdf]

**Novel fluorescein polymers based nanoparticles: Facile and controllable  
one-pot synthesis, assembly, and immobilization of biomolecules for  
application of highly sensitive biosensor**

Jiseob Woo<sup>a,b</sup>, Heesun Park<sup>a,c</sup>, Yoonhee Na<sup>a,b</sup>, Sunghyun Kim<sup>a</sup>, Won Il Choi<sup>a</sup>, Jinhyung Lee<sup>a</sup>,  
Hyemi Seo<sup>a</sup>, Daekyung Sung<sup>a,\*</sup>

<sup>a</sup> Center for Convergence Bioceramic Materials, Convergence R&D Division, Korea Institute of Ceramic Engineering and Technology, 202, Osongsaengmyeong 1-ro, Osong-eup, Heungdeok-gu, Cheongju, Chungbuk 28160, Republic of Korea

<sup>b</sup> School of Chemical & Biomolecular Engineering, Yonsei University, 50 Yonsei Ro, Seodaemun Gu, Seoul, 03722, Republic of Korea

<sup>c</sup> Life science and biotechnology Division of life science, Korea University, 145 Anam-ro, seonguk gu, seoul, 0241, Republic of Korea

\* To whom the correspondence should be made

D.K. Sung; E-mail: dksung@kicet.re.kr / Phone: 82-43-913-1511 / Fax: 82-43-913-1597

Supplementary Figure S1. NMR spectrum of the synthesized fluorescein polymers with assigned peaks.

Poly F1

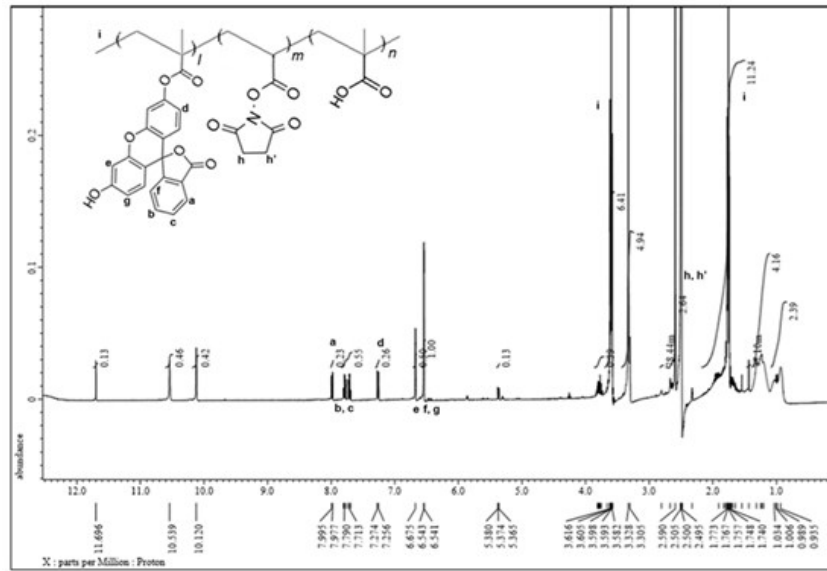

Poly F2

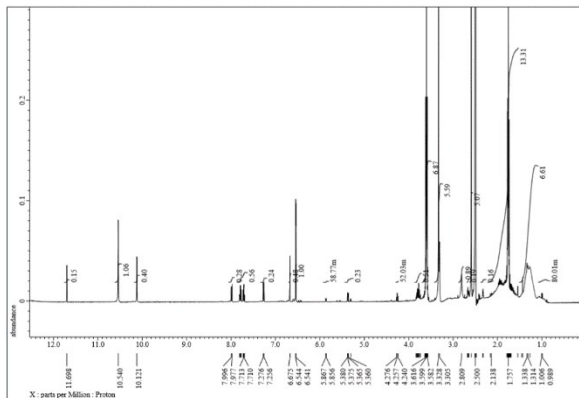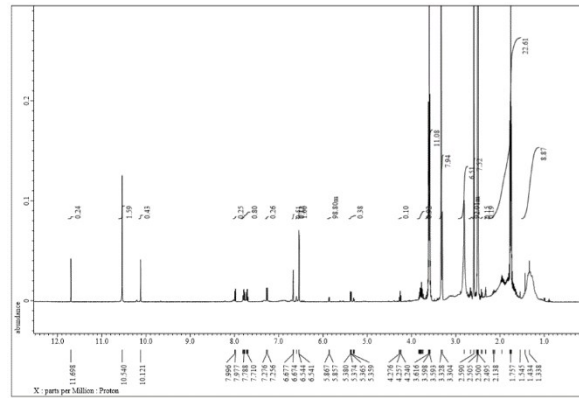

Poly F3

**Supplementary Figure S2.** GPC chromatogram of the synthesized fluorescein polymers.

**Poly F1**

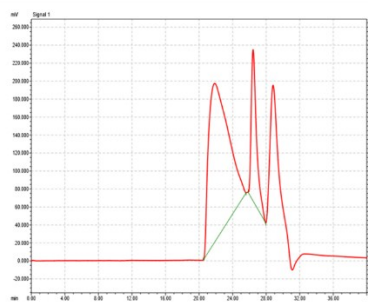

**Poly F2**

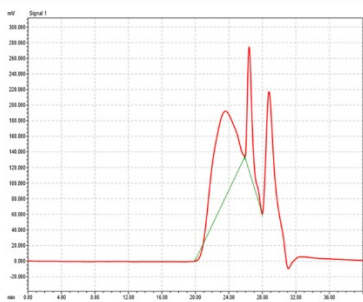

**Poly F3**

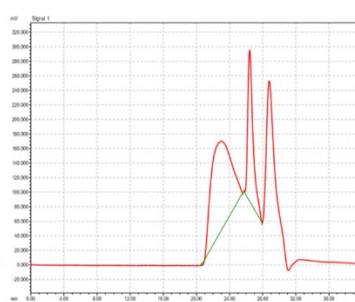

**Supplementary Figure S3.** Photographic images of the stability test for the BSA-immobilized FPNPs, left to right: FPNP1-BSA, FPNP2-BSA, and FPNP3-BSA.

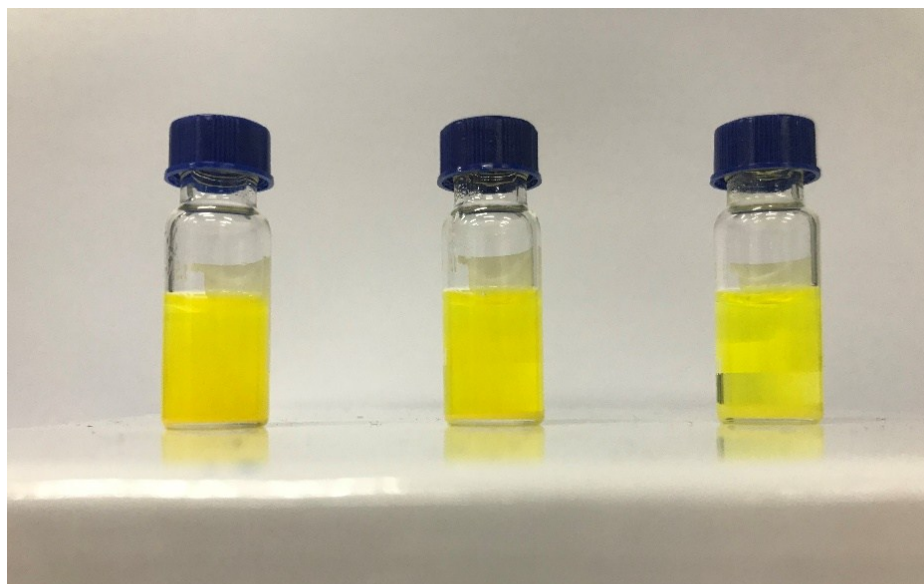

**Supplementary Figure S4.** Fluorescence sensitivity for BSA detection table for the concentration ranging from 0 to 10ug/ml (Error bars represent the standard deviation of at least three repetitive experiments).

| Anti-BSA Concentration       |           | 10ug/ml  | 1ug/ml   | 100ng/ml | 10ng/ml  | 1ng/ml  | 0.1ng/ml | 0.01ng/ml | 0ng/ml |
|------------------------------|-----------|----------|----------|----------|----------|---------|----------|-----------|--------|
| Fluorescent Intensity (a.u.) | FPNPs-BSA | 3006±486 | 2762±399 | 2268±151 | 1867±178 | 1434±60 | 1123±70  | 856±48    | 732±16 |
|                              | FITC-BSA  | 685±40   | 560±24   | 545±30   | 521±17   | 517±31  | 486±23   | 469±24    | 449±6  |
